# Supplementary material for: Haematopoietic stem cell transplantation in adult soft-tissue sarcoma: an analysis from the European Society for Blood and Marrow Transplantation
Source: PubMed Central journal article supplement — ESMO Open. 2020 Oct 23;5(5):e000860. doi: 10.1136/esmoopen-2020-000860 (PMC7590345; doi:10.1136/esmoopen-2020-000860), 2020-10-23
Supplement: esmoopen-2020-000860supp001.pdf [file esmoopen-2020-000860supp001.pdf]

**Patient Characteristics and Treatments of Patients in CR versus patients not in CR prior ASCT**

| <b>Characteristic</b>                           | <b>not in CR<br/>n=219</b>      | <b>CR<br/>n=55</b>              |
|-------------------------------------------------|---------------------------------|---------------------------------|
| Follow-up in months [reverse KM] - median (IQR) | 130.3 (35.2-164.0)              | 98.6 (54.3-132.3)               |
| <b>Age at 1st ASCT, years</b>                   |                                 |                                 |
| median (range) [IQR]                            | 38.2 (18.1-69.6)<br>[27.9-50.4] | 30.5 (18.1-63.6)<br>[22.5-48.6] |
| <b>Patient sex</b>                              |                                 |                                 |
|                                                 | <b>n (%)</b>                    | <b>n (%)</b>                    |
| Male                                            | 126 (57.5%)                     | 34 (61.8%)                      |
| Female                                          | 93 (42.5%)                      | 21 (38.2%)                      |
| missing                                         |                                 |                                 |
| <b>Histology</b>                                |                                 |                                 |
|                                                 | <b>n (%)</b>                    | <b>n (%)</b>                    |
| Leiomyosarcoma                                  | 47 (21.5%)                      | 7 (12.7%)                       |
| Synovial sarcoma                                | 36 (16.4%)                      | 6 (10.9%)                       |
| Angiosarcoma*                                   | 25 (11.4%)                      | 9 (16.4%)                       |
| Liposarcoma                                     | 21 (9.6%)                       | 7 (12.7%)                       |
| Desmoplastic small round cell tumor             | 4 (1.8%)                        | 3 (5.5%)                        |
| other STS§                                      | 86 (39.3%)                      | 23 (41.8%)                      |
| <b>Tumor Grading</b>                            |                                 |                                 |
|                                                 | <b>n (%)</b>                    | <b>n (%)</b>                    |
| Grade 1                                         | 4 (5.7%)                        | 0 (0%)                          |
| Grade 2                                         | 11 (15.7%)                      | 7 (29.2%)                       |
| Grade 3                                         | 55 (78.6%)                      | 17 (70.8%)                      |
| missing                                         | 149                             | 31                              |
| <b>Metastatic disease at diagnosis</b>          |                                 |                                 |
|                                                 | <b>n (%)</b>                    | <b>n (%)</b>                    |
| No                                              | 39 (55.7%)                      | 10 (52.6%)                      |
| Yes                                             | 31 (44.3%)                      | 9 (47.4%)                       |
| Unknown/missing                                 | 149                             | 36                              |
| <b>Treatment before ASCT</b>                    |                                 |                                 |
|                                                 | <b>n (%)</b>                    | <b>n (%)</b>                    |
| Surgery                                         |                                 |                                 |
| Yes                                             | 58 (59.8%)                      | 28 (90.3%)                      |
| No                                              | 39 (40.2%)                      | 3 (9.7%)                        |
| Missing                                         | 122                             | 24                              |
| Radiotherapy                                    |                                 |                                 |
| Yes                                             | 30 (31.6%)                      | 9 (32.1%)                       |
| No                                              | 65 (68.4%)                      | 19 (67.9%)                      |

|                                                          |                  |                   |
|----------------------------------------------------------|------------------|-------------------|
| Missing                                                  | 124              | 27                |
| <b>Chemotherapy</b>                                      |                  |                   |
| Yes                                                      | 92 (92%)         | 28 (93.3%)        |
| Median no. regimens (range)                              | 1 (1-7)          | 1 (1-7)           |
| ≥ 2 regimens                                             | 26               | 8                 |
| None                                                     | 8 (8%)           | 2 (6.7%)          |
| Missing                                                  | 119              | 25                |
| <hr/>                                                    |                  |                   |
| <b>Remission status before ASCT</b>                      | <b>n (%)</b>     | <b>n (%)</b>      |
| complete response/no evidence of disease                 |                  | 55 (100%)         |
| partial response                                         | 107 (48.9%)      |                   |
| stable disease                                           | 28 (12.8%)       |                   |
| progressive disease                                      | 84 (38.4%)       |                   |
| <hr/>                                                    |                  |                   |
| <b>Year of 1st ASCT</b>                                  | <b>n (%)</b>     | <b>n (%)</b>      |
| 1996-2000                                                | 106 (48.4%)      | 16 (29.1%)        |
| 2001-2005                                                | 66 (30.1%)       | 21 (38.2%)        |
| 2006-2016                                                | 47 (21.5%)       | 18 (32.7%)        |
| <hr/>                                                    |                  |                   |
| <b>Preparative regimen</b>                               | <b>n (%)</b>     | <b>n (%)</b>      |
| PEI/CEI                                                  | 51 (43.2%)       | 17 (47.2%)        |
| Other Platinum-based                                     | 22 (18.6%)       | 6 (16.7%)         |
| Melphalan-based                                          | 28 (23.7%)       | 11 (30.6%)        |
| Other                                                    | 17 (14.4%)       | 2 (5.6%)          |
| missing                                                  | 101              | 19                |
| <hr/>                                                    |                  |                   |
| <b>Remission status after last ASCT</b>                  | <b>n (%)</b>     | <b>n (%)</b>      |
| complete response/no evidence of disease                 | 49 (44.5%)       | 36 (85.7%)        |
| partial response                                         | 18 (16.4%)       | 1 (2.4%)          |
| stable disease                                           | 22 (20%)         | 0 (0%)            |
| progressive disease                                      | 21 (19.1%)       | 5 (11.9%)         |
| missing                                                  | 109              | 13                |
| <hr/>                                                    |                  |                   |
| <b>Endpoints</b>                                         |                  |                   |
| 5 year probability of progression-free survival (95% CI) | 10.4% (6.5-15.5) | 25.9% (14.5-38.9) |
| 5 year probability of overall survival (95% CI)          | 20% (14.4-26.3)  | 43.2% (28.7-56.9) |
| Median progression-free survival, months (95% CI)        | 7.2 (5.8-8.5)    | 14.1 (10.7-17.5)  |
| Median overall survival, months (95% CI)                 | 17.8 (15.8-19.9) | 44.1 (15.3-72.9)  |
