# Supplementary figures and images for: Haematopoietic stem cell transplantation in adult soft-tissue sarcoma: an analysis from the European Society for Blood and Marrow Transplantation
Source: PubMed Central journal article supplement — ESMO Open. 2020 Oct 23;5(5):e000860. doi: 10.1136/esmoopen-2020-000860 (PMC7590345; doi:10.1136/esmoopen-2020-000860), 2020-10-23

Figure S1:

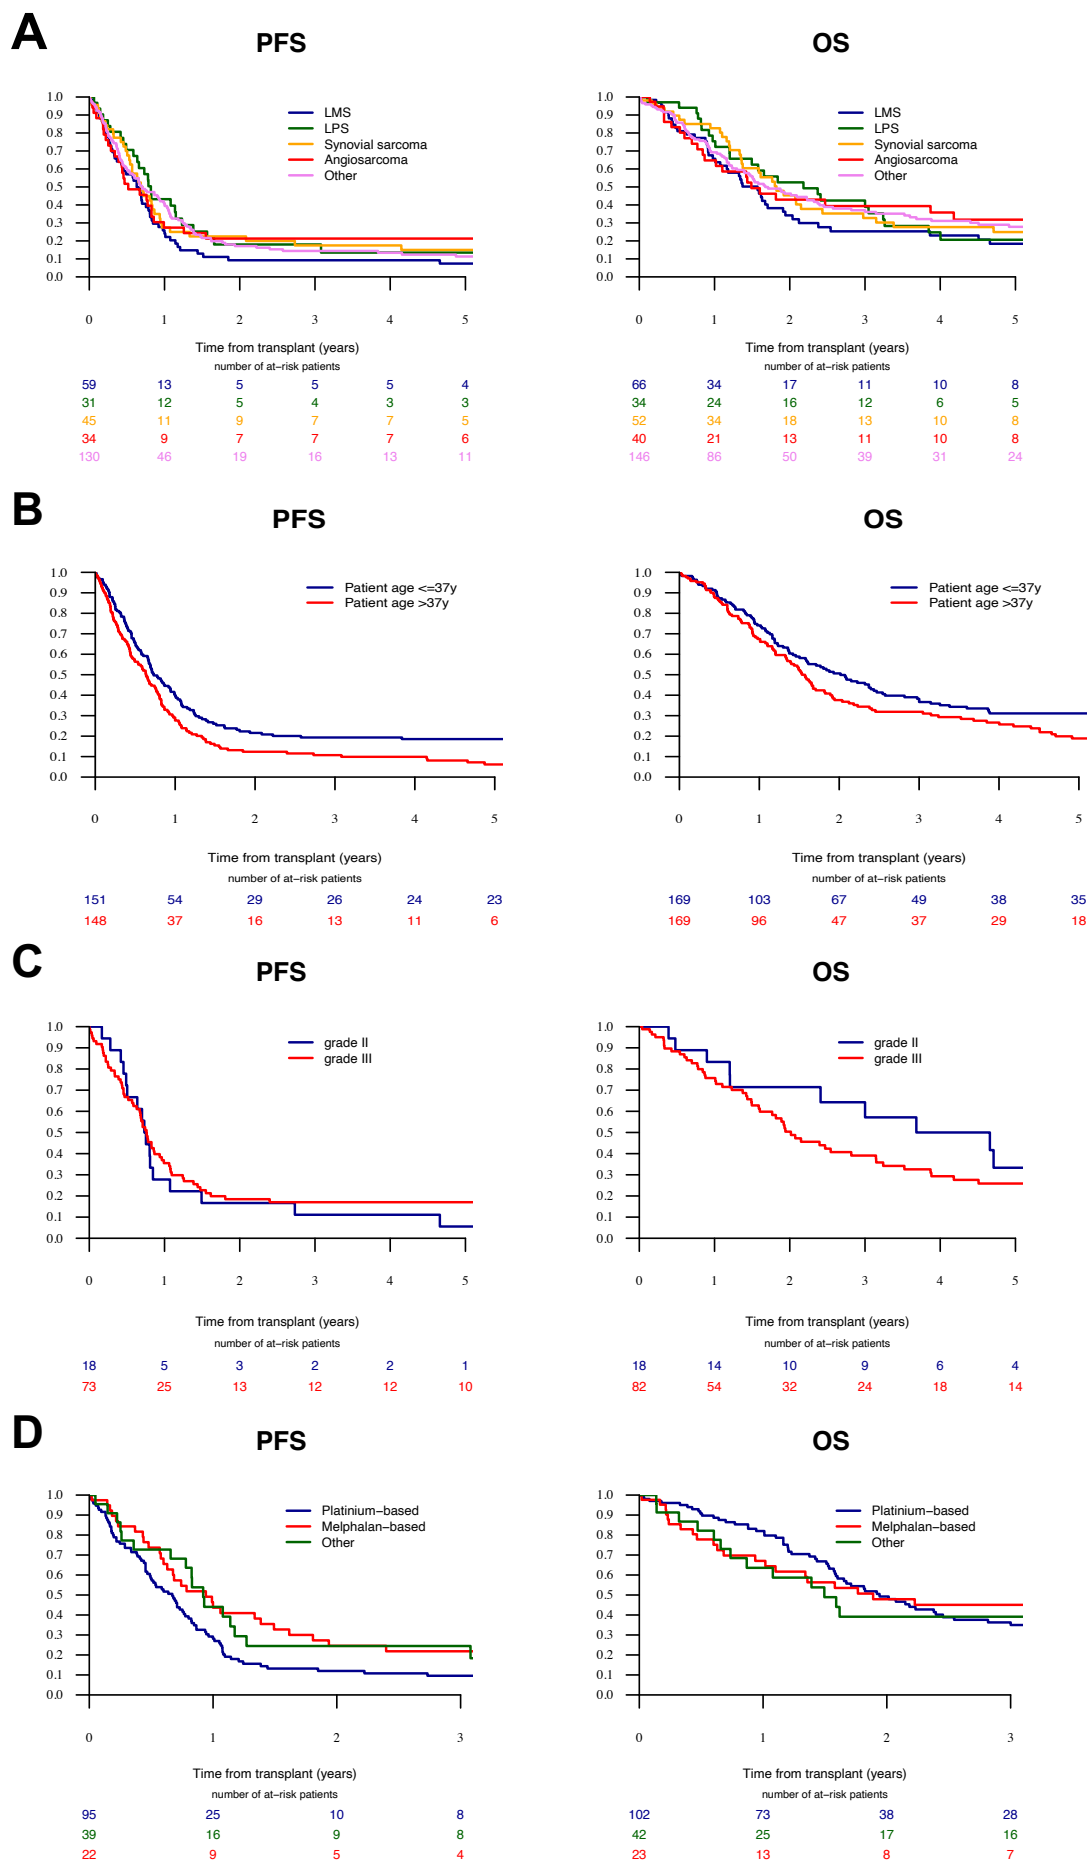

Supplement: esmoopen-2020-000860supp002.pdf [file esmoopen-2020-000860supp002.pdf]
